# Supplementary material for: Water T2 as an early, global and practical biomarker for metabolic syndrome: an observational cross-sectional study
Source: J Transl Med. 2017 Dec 19;15:258. doi: 10.1186/s12967-017-1359-5 (PMC5738216; doi:10.1186/s12967-017-1359-5)
Supplement: Supplementary file 1 — Additional file 1: Table S1. Correlation coefficients for plasma water T2-provides a full set of Pearson, Spearman and Huber correlation coefficients for biomarkers that have a statistically significant correlation with plasma water T2. Table S2. Correlation coefficients for Serum water T2-provides a full set of Pearson, Spearman and Huber correlation coefficients for biomarkers that have a statistically significant correlation with serum water T2. Table S3. Principal components analysis with variable clustering-provides clusters of related variables and most representative variable in each cluster. Table S4. Multiple regression models for plasma water T2-provides parameter details for the best multiple regression models for plasma water T2. Table S5. Multiple regression models for Serum water T2-provides parameter details for the best multiple regression models for serum water T2. [file 12967_2017_1359_MOESM1_ESM.pdf]

**Supplementary Table S1: Correlation Coefficients for Plasma Water T<sub>2</sub>**

| <u>Biomarker</u> <sup>1,2,3</sup>             | <u>n</u> | <u>r (Pearson)</u> | <u>ρ (Spearman)</u> | <u>M-value (Huber)</u> |
|-----------------------------------------------|----------|--------------------|---------------------|------------------------|
| <b>Insulin and Glucose Markers</b>            |          |                    |                     |                        |
| Insulin C-peptide                             | 70       | -0.63****          | -0.58****           | -0.65****              |
| HOMA-IR <sup>4</sup> (insulin c-peptide)      | 70       | -0.62****          | -0.58****           | -0.64****              |
| McAuley Index <sup>4</sup>                    | 70       | +0.61****          | +0.62****           | +0.64****              |
| Insulin                                       | 70       | -0.57****          | -0.53****           | -0.57****              |
| HOMA-IR <sup>4</sup> (insulin)                | 70       | -0.54****          | -0.46***            | -0.56****              |
| QUICKI <sup>4</sup>                           | 70       | +0.56****          | +0.53****           | +0.60****              |
| FIRI <sup>4</sup>                             | 70       | -0.56****          | -0.51****           | -0.58****              |
| Glucose/Insulin ratio <sup>4</sup>            | 70       | +0.56****          | +0.52****           | +0.55****              |
| Proinsulin                                    | 42       | -0.53***           | -0.44**             | -0.53***               |
| HbA1c                                         | 69       | -0.47***           | -0.50****           | -0.54****              |
| Glucose                                       | 70       | -0.26*             | -0.28*              | -0.28*                 |
| <b>Protein, Viscosity &amp; Liver Markers</b> |          |                    |                     |                        |
| Total protein, serum                          | 69       | -0.54****          | -0.56****           | -0.56****              |
| Serum globulins                               | 69       | -0.49****          | -0.51****           | -0.53****              |
| Serum % globulins                             | 69       | -0.37**            | -0.39***            | -0.46****              |
| Serum viscosity                               | 65       | -0.35**            | -0.32**             | -0.30*                 |
| Total protein, plasma                         | 41       | -0.54***           | -0.57****           | -0.55***               |
| Plasma globulins                              | 41       | -0.67****          | -0.68****           | -0.66****              |
| Plasma % globulins                            | 41       | -0.58****          | -0.51***            | -0.56***               |
| Plasma viscosity                              | 51       | -0.54****          | -0.53****           | -0.47***               |
| γ-glutamyl transferase (GGT)                  | 69       | -0.39***           | -0.38**             | -0.37**                |
| Alanine aminotransferase (ALT)                | 52       | -0.32*             | -0.33*              | -0.37*                 |
| Serine (Ser)                                  | 55       | +0.54****          | +0.54****           | +0.55****              |
| Asparagine (Asn)                              | 55       | +0.47***           | +0.48***            | +0.36**                |
| Glutamine (Gln)                               | 55       | +0.34*             | +0.34*              | +0.28*                 |
| Threonine (Thr)                               | 55       | +0.30*             | +0.29*              | +0.29*                 |
| β-Alanine                                     | 55       | +0.35*             | +0.33*              | +0.27*                 |
| <b>Lipid &amp; Lipoprotein Markers</b>        |          |                    |                     |                        |
| Apolipoprotein B (apo B)                      | 70       | -0.53****          | -0.56****           | -0.55****              |
| Non-HDL-cholesterol                           | 70       | -0.53****          | -0.55****           | -0.52****              |
| LDL-cholesterol (LDL-C)                       | 70       | -0.51****          | -0.53****           | -0.50****              |

**Supplementary Table S1 (continued):**  
**Correlation Coefficients for Plasma Water T<sub>2</sub>**

| <u>Biomarker<sup>1,2</sup></u>                                     | <u>n</u> | <u>r (Pearson)</u> | <u>ρ (Spearman)</u> | <u>M-value (Huber)</u> |
|--------------------------------------------------------------------|----------|--------------------|---------------------|------------------------|
| <b>Lipid &amp; Lipoprotein Markers (con't)</b>                     |          |                    |                     |                        |
| Total cholesterol                                                  | 70       | -0.50*****         | -0.53*****          | -0.50*****             |
| LDL particle number (LDL-P)                                        | 70       | -0.48*****         | -0.52*****          | -0.52*****             |
| Triglycerides (TG)                                                 | 70       | -0.47*****         | -0.48*****          | -0.54*****             |
| VLDL-cholesterol (VLDL-C)                                          | 63       | -0.40**            | -0.40**             | -0.44***               |
| Remnant-cholesterol (Rem-C) <sup>5</sup>                           | 63       | -0.39**            | -0.43***            | -0.44***               |
| <b>Inflammation/Blood Cell Markers</b>                             |          |                    |                     |                        |
| White blood cell count (WBC)                                       | 69       | -0.56*****         | -0.52*****          | -0.58*****             |
| Neutrophil count                                                   | 69       | -0.49***           | -0.43***            | -0.41***               |
| Platelet count                                                     | 69       | -0.35**            | -0.36**             | -0.42***               |
| Lymphocyte count                                                   | 69       | -0.31**            | -0.32**             | -0.40***               |
| Monocyte count                                                     | 69       | -0.29*             | -0.28*              | -0.29*                 |
| Red cell distribution width (RDW)                                  | 69       | -0.24*             | -0.31**             | -0.33**                |
| Mean corpuscular volume (MCV)                                      | 69       | +0.25*             | +0.26*              | +0.28*                 |
| Mean corpuscular hemoglobin (MCH)                                  | 69       | +0.25*             | +0.24*              | +0.26*                 |
| C-reactive protein (CRP)                                           | 69       | -0.49*****         | -0.47*****          | -0.51*****             |
| Fibrinogen                                                         | 43       | -0.68*****         | -0.67*****          | -0.65*****             |
| Complement C3c                                                     | 40       | -0.53***           | -0.54***            | -0.52***               |
| Complement C4c                                                     | 40       | -0.45**            | -0.50***            | -0.59*****             |
| Platelet activator inhibitor-1 (PAI-1)                             | 43       | -0.50***           | -0.38*              | -0.35*                 |
| α1-acid glycoprotein                                               | 42       | -0.39*             | -0.38*              | -0.38*                 |
| Haptoglobin                                                        | 41       | -0.45**            | -0.34*              | -0.21(ns)              |
| Interleukin-6 (IL-6)                                               | 35       | -0.39*             | -0.43**             | -0.33*                 |
| <b>Electrolyte Markers</b>                                         |          |                    |                     |                        |
| Lactate                                                            | 41       | -0.49**            | -0.49**             | -0.53***               |
| Anion Gap, uncorrected                                             | 69       | -0.43***           | -0.49*****          | -0.55*****             |
| Anion Gap, corrected for albumin                                   | 68       | -0.41***           | -0.46*****          | -0.44***               |
| Cl <sup>-</sup> + CO <sub>2</sub> (HCO <sub>3</sub> <sup>-</sup> ) | 69       | +0.41***           | +0.40***            | +0.36**                |
| <b>Other Markers</b>                                               |          |                    |                     |                        |
| Serum T <sub>2</sub>                                               | 67       | +0.80*****         | +0.79*****          | +0.81*****             |
| Plasma T <sub>1</sub>                                              | 70       | +0.46*****         | +0.54*****          | +0.55*****             |

## Supplementary Table S1 (continued): Correlation Coefficients for Plasma Water T<sub>2</sub>

### Footnotes

<sup>1</sup>All blood samples were drawn in the early morning following a 12-hour overnight fast. \*p<0.05; \*\*p<0.01; \*\*\*p<0.001; \*\*\*\*p<0.0001.

<sup>2</sup>This table includes those biomarkers that were correlated with plasma water T<sub>2</sub>. Ambiguous correlations are described in the Methods section.

<sup>3</sup>Many of the variables were natural-log transformed in order to meet the normality condition, an assumption inherent to the Pearson correlation. The correlation coefficients reported here and in Supplementary Tables 1 and 2 are for the ln-transformed variables, except the McAuley Index and QUICKI, as these indices are inherently ln-transformed. Other variables that were normally distributed and analyzed without ln transformation were plasma and serum T<sub>2</sub>, total serum and plasma protein, serum and plasma globulins and % globulins, serum and plasma viscosity, HbA1c, LDL-C, LDL-P, total C, apolipoprotein B, lymphocyte and platelet counts, lactate, and complement C3c.

<sup>4</sup>As defined elsewhere: McAuley Index (37), HOMA-IR (61, 63), QUICKI (65), FIRI (64), G/I ratio (66)

<sup>5</sup>Remnant cholesterol is defined as intermediate-density lipoprotein (IDL) plus VLDL<sub>3</sub>, as determined using the Vertical Autoprofile method (112).

**Supplementary Table S2: Correlation Coefficients for Serum Water T<sub>2</sub>**

| Biomarker <sup>1,2,3</sup>                    | n  | r (Pearson) | ρ (Spearman) | M-value (Huber) |
|-----------------------------------------------|----|-------------|--------------|-----------------|
| <b>Insulin &amp; Glucose Markers</b>          |    |             |              |                 |
| McAuley Index <sup>4</sup>                    | 69 | +0.58*****  | +0.61*****   | +0.70*****      |
| Insulin                                       | 69 | -0.54*****  | -0.52*****   | -0.60*****      |
| HOMA-IR <sup>4</sup> (insulin)                | 69 | -0.52*****  | -0.49*****   | -0.58*****      |
| QUICKI <sup>4</sup>                           | 69 | +0.55*****  | +0.52*****   | +0.57*****      |
| FIRI <sup>4</sup>                             | 69 | -0.55*****  | -0.52*****   | -0.59*****      |
| Glucose/Insulin ratio <sup>4</sup>            | 69 | +0.53*****  | +0.52*****   | +0.58*****      |
| Insulin c-peptide                             | 69 | -0.50*****  | -0.47*****   | -0.45*****      |
| HOMA-IR <sup>4</sup> (c-peptide)              | 69 | -0.50*****  | -0.47***     | -0.46*****      |
| Proinsulin                                    | 43 | -0.55***    | -0.49**      | -0.60***        |
| HbA1c                                         | 68 | -0.36***    | -0.40*****   | -0.43*****      |
| Glucose                                       | 69 | -0.28*      | -0.28*       | -0.28*          |
| <b>Protein, Viscosity &amp; Liver Markers</b> |    |             |              |                 |
| Total protein, serum                          | 68 | -0.76*****  | -0.78*****   | -0.79*****      |
| Serum globulins                               | 68 | -0.59*****  | -0.63*****   | -0.65*****      |
| Serum % globulins                             | 68 | -0.40***    | -0.45***     | -0.50*****      |
| Serum viscosity                               | 67 | -0.46*****  | -0.44***     | -0.45***        |
| Total protein, plasma                         | 42 | -0.70*****  | -0.72*****   | -0.72*****      |
| Plasma globulins                              | 42 | -0.72*****  | -0.74*****   | -0.69*****      |
| Plasma % globulins                            | 42 | -0.53***    | -0.51***     | -0.45**         |
| Plasma viscosity                              | 52 | -0.50***    | -0.56*****   | -0.56*****      |
| Immunoglobulin G (IgG)                        | 44 | -0.48***    | -0.47**      | -0.66*****      |
| Alanine aminotransferase (ALT)                | 50 | -0.31*      | -0.33*       | -0.35**         |
| Tyrosine (Tyr)                                | 54 | -0.43**     | -0.42**      | -0.43***        |
| 1-Methyl-Histidine                            | 54 | +0.28*      | +0.33*       | +0.32*          |
| <b>Lipid &amp; Lipoprotein Markers</b>        |    |             |              |                 |
| Apolipoprotein B (apoB)                       | 69 | -0.53*****  | -0.54*****   | -0.52*****      |
| Non-HDL-cholesterol                           | 69 | -0.56*****  | -0.55*****   | -0.52*****      |
| LDL-cholesterol (LDL-C)                       | 69 | -0.55*****  | -0.52*****   | -0.53*****      |
| Total cholesterol                             | 69 | -0.54*****  | -0.51*****   | -0.51*****      |
| LDL particle number (LDL-P)                   | 68 | -0.55*****  | -0.56*****   | -0.54*****      |
| Triglycerides (TG)                            | 69 | -0.44***    | -0.48*****   | -0.54*****      |
| VLDL-cholesterol (VLDL-C)                     | 62 | -0.44***    | -0.43***     | -0.49*****      |
| Remnant-cholesterol (Rem-C) <sup>5</sup>      | 62 | -0.46***    | -0.46***     | -0.53*****      |
| LpPLA2                                        | 68 | +0.26*      | +0.29*       | +0.29*          |

**Supplementary Table S2 (continued):**  
**Correlation Coefficients for *Serum Water T<sub>2</sub>***

| <u>Biomarker</u> <sup>1,2,3</sup>                                  | <u>n</u> | <u>r (Pearson)</u> | <u>ρ (Spearman)</u> | <u>M-value (Huber)</u> |
|--------------------------------------------------------------------|----------|--------------------|---------------------|------------------------|
| <b>Inflammation &amp; Blood Cell Markers</b>                       |          |                    |                     |                        |
| White blood cell count (WBC)                                       | 68       | -0.42***           | -0.42***            | -0.47****              |
| Neutrophil count                                                   | 68       | -0.34**            | -0.31*              | -0.37**                |
| Lymphocyte count                                                   | 68       | -0.33**            | -0.32**             | -0.36**                |
| Red blood cell count                                               | 68       | -0.28*             | -0.24*              | -0.26*                 |
| Hematocrit                                                         | 68       | -0.25*             | -0.24 (ns)          | -0.26*                 |
| C-reactive protein (CRP)                                           | 68       | -0.25*             | -0.29*              | -0.31**                |
| Fibrinogen                                                         | 44       | -0.48**            | -0.44**             | -0.40**                |
| Complement C3c                                                     | 41       | -0.39*             | -0.39*              | -0.44**                |
| Complement C4c                                                     | 41       | -0.43**            | -0.39*              | -0.43**                |
| <b>Electrolyte Markers</b>                                         |          |                    |                     |                        |
| Lactate                                                            | 42       | -0.47**            | -0.50***            | -0.49***               |
| Anion Gap, uncorrected                                             | 68       | -0.41***           | -0.44***            | -0.43***               |
| Anion Gap, corrected for albumin                                   | 67       | -0.35**            | -0.40***            | -0.39***               |
| Cl <sup>-</sup> + CO <sub>2</sub> (HCO <sub>3</sub> <sup>-</sup> ) | 68       | +0.36**            | +0.33**             | +0.30*                 |
| <b>NMR Markers</b>                                                 |          |                    |                     |                        |
| Plasma T <sub>2</sub>                                              | 67       | +0.80****          | +0.79****           | +0.81****              |
| Plasma T <sub>1</sub>                                              | 68       | +0.32**            | +0.40***            | +0.45***               |
| Serum T <sub>1</sub>                                               | 69       | +0.61****          | +0.63****           | +0.66****              |

### Footnotes

<sup>1</sup>All blood samples were drawn in the early morning following a 12-hour overnight fast. \*p<0.05; \*\*p<0.01; \*\*\*p<0.001; \*\*\*\*p<0.0001.

<sup>2</sup>This table includes those biomarkers that were correlated with serum water T<sub>2</sub>. Ambiguous correlations are described in the Methods section.

<sup>3</sup>Many variables were natural-log transformed in order to meet the normality condition, an assumption inherent to the Pearson correlation. The correlation coefficients reported here and in Supplementary Tables 1 and 2 are for the ln-transformed variables, except the McAuley Index and QUICKI, as these indices are inherently ln-transformed. Other variables that were normally distributed and analyzed without ln transformation were plasma and serum T<sub>2</sub>, total serum and plasma protein, serum and plasma globulins and % globulins, serum and plasma viscosity, HbA1c, LDL-C, LDL-P, total C, apolipoprotein B, lymphocyte and platelet counts, lactate, and complement C3c.

**Supplementary Table S2 (continued):**  
**Correlation Coefficients for Serum Water T<sub>2</sub>**

<sup>4</sup>As defined elsewhere: McAuley Index (37), HOMA-IR (61, 63), QUICKI (65), FIRI (64), G/I ratio (66)

<sup>5</sup>Remnant cholesterol is defined as intermediate-density lipoprotein (IDL) plus VLDL<sub>3</sub>, as determined using the Vertical Autoprofile method (112).

**Supplementary Table S3:**  
**Principal Components Analysis with Variable Clustering**

| <u>Cluster</u> | <u>Most Representative Variable</u>            | <u>Other variables in cluster</u>                                                                |
|----------------|------------------------------------------------|--------------------------------------------------------------------------------------------------|
| 1              | insulin c-peptide                              | insulin, proinsulin, glucose, ALT, GGT, RDW                                                      |
| 2              | plasma globulins                               | serum globulins, serum %globulins,<br>plasma %globulins                                          |
| 3              | serum viscosity                                | plasma viscosity, total plasma protein                                                           |
| 4              | serum water T <sub>2</sub>                     | serum T <sub>1</sub> , total serum protein                                                       |
| 5              | non-HDL-cholesterol                            | LDL-C, IDL-C, VLDL-C, total cholesterol, TG,<br>apolipoprotein B, LDL-P, phospholipids           |
| 6              | white blood cell count                         | neutrophil & platelet counts, C-reactive protein,<br>erythrocyte sedimentation rate, haptoglobin |
| 7              | fibrinogen                                     | complement C3c, C4c, IL-6, Ser, Asn, Thr,<br>plasma water T <sub>2</sub>                         |
| 8              | mean corpuscular<br>hemoglobin                 | lymphocyte count                                                                                 |
| 9              | Cl <sup>-</sup> + CO <sub>2</sub> <sup>-</sup> | anion gap, anion gap corrected for [albumin]                                                     |

**Supplementary Table S4: Multiple Regression Models for Plasma Water T<sub>2</sub>**

| <u>Model</u> | <u>R<sup>2</sup><sub>adj</sub> (observations)<sup>1</sup></u> | <u>Predictor Variables</u> | <u>Coefficients</u> | <u>p values</u> |
|--------------|---------------------------------------------------------------|----------------------------|---------------------|-----------------|
| 1            | 0.67 (68)                                                     | ln insulin c-peptide       | -48.9 ± 10.1        | <0.0001         |
|              |                                                               | total serum protein        | -46.6 ± 10.5        | <0.0001         |
|              |                                                               | total cholesterol          | -0.3 ± 0.1          | 0.0048          |
|              |                                                               | ln WBC count               | -69.4 ± 18.6        | <0.0001         |
|              |                                                               | y-intercept                | 1330.9 ± 74.1       | <0.0001         |
| 2            | 0.72 (41)                                                     | ln insulin c-peptide       | -46.2 ± 14.2        | 0.0024          |
|              |                                                               | total plasma protein       | -40.1 ± 13.0        | 0.0039          |
|              |                                                               | apolipoprotein B           | -0.7 ± 0.2          | 0.0025          |
|              |                                                               | ln WBC count               | -56.8 ± 23.3        | 0.0200          |
|              |                                                               | y-intercept                | 1256.8 ± 95.7       | <0.0001         |
| 3            | 0.72 (41)                                                     | ln insulin c-peptide       | -44.7 ± 14.1        | 0.0031          |
|              |                                                               | plasma globulins           | -66.3 ± 15.6        | 0.0001          |
|              |                                                               | apolipoprotein B           | -0.8 ± 0.2          | 0.0008          |
|              |                                                               | y-intercept                | 1058.4 ± 45.4       | <0.0001         |
| 4            | 0.75 (41)                                                     | ln insulin c-peptide       | -32.1 ± 14.6        | 0.0345          |
|              |                                                               | plasma globulins           | -57.9 ± 15.4        | 0.0006          |
|              |                                                               | apolipoprotein B           | -0.7 ± 0.2          | 0.0013          |
|              |                                                               | ln fibrinogen              | -55.2 ± 25.0        | 0.0339          |
|              |                                                               | y-intercept                | 1330.2 ± 130.6      | <0.0001         |

<sup>1</sup>Models 2, 3 and 4 included predictor variables that were collected during phase 2 only (n=42), while model 1 used only variables that were collected during *both* phase 1 and phase 2 of the study (n=72). R<sup>2</sup><sub>adj</sub> is the R<sup>2</sup> value adjusted for the number of predictor variables.

**Supplementary Table S5: Multiple Regression Models for Serum Water T<sub>2</sub>**

| <u>Model</u> | <u>R<sup>2</sup><sub>adj</sub> (observations)<sup>1</sup></u> | <u>Predictor Variables</u> | <u>Coefficients</u> | <u>p values</u> |
|--------------|---------------------------------------------------------------|----------------------------|---------------------|-----------------|
|              |                                                               |                            |                     |                 |
| 1            | 0.71 (67)                                                     | ln insulin                 | -16.3 ± 7.7         | 0.0374          |
|              |                                                               | total serum protein        | -89.2 ± 10.5        | <0.0001         |
|              |                                                               | LDL-P                      | -0.04 ± 0.01        | 0.0002          |
|              |                                                               | y-intercept                | 1544.2 ± 70.2       | <0.0001         |
|              |                                                               |                            |                     |                 |
| 2            | 0.72 (68)                                                     | ln insulin c-peptide       | -23.6 ± 9.3         | 0.0137          |
|              |                                                               | total serum protein        | -93.2 ± 9.8         | <0.0001         |
|              |                                                               | apolipoprotein B           | -0.65 ± 0.16        | 0.0001          |
|              |                                                               | y-intercept                | 1557.8 ± 68.0       | <0.0001         |
|              |                                                               |                            |                     |                 |
| 3            | 0.75 (41)                                                     | lactate                    | -19.2 ± 8.6         | 0.0309          |
|              |                                                               | total serum protein        | -89.9 ± 13.1        | <0.0001         |
|              |                                                               | apolipoprotein B           | -0.92 ± 0.19        | <0.0001         |
|              |                                                               | y-intercept                | 1584.4 ± 89.2       | <0.0001         |
|              |                                                               |                            |                     |                 |
| 4            | 0.76 (41)                                                     | McAuley Index              | 9.6 ± 2.6           | 0.0007          |
|              |                                                               | total serum protein        | -89.3 ± 12.7        | <0.0001         |
|              |                                                               | ln fibrinogen              | -69.9 ± 20.5        | 0.0015          |
|              |                                                               | y-intercept                | 1774.8 ± 164.8      | <0.0001         |

<sup>1</sup>Models 3 and 4 included predictor variables that were collected during phase 2 only (n=42), while models 1 and 2 used variables that were collected during both phase 1 and phase 2 of the study (n=72). R<sup>2</sup><sub>adj</sub> is the R<sup>2</sup> value adjusted for the number of predictor variables.
